# Supplementary material for: The altered gut virome community in rhesus monkeys is correlated with the gut bacterial microbiome and associated metabolites
Source: Virol J. 2019 Aug 19;16:105. doi: 10.1186/s12985-019-1211-z (PMC6700990; doi:10.1186/s12985-019-1211-z)
Supplement: Supplementary file 3 — Table S1. The reads number on the genus level in the gut bacterial communities in a longitudinal cohort treated with an antibiotic cocktail. (XLS 22 kb) [file 12985_2019_1211_MOESM3_ESM.xls]

## Sheet: OTU表
Domain	Kingdom	Phylum	Class	Order	Family	Genus	D0_1	D0_2	D0_3	D5_1	D5_2	D5_3	D9_1	D9_2	D9_3
d__Bacteria	k__norank	p__Firmicutes	c__Clostridia	o__Clostridiales	f__Clostridiales_vadinBB60_group	g__norank_f__Clostridiales_vadinBB60_group	1	0	0	0	0	0	0	0	0
d__Bacteria	k__norank	p__Firmicutes	c__Bacilli	o__Bacillales	f__Paenibacillaceae	g__Ammoniphilus	0	0	1	0	0	0	1	4	0
d__Bacteria	k__norank	p__Firmicutes	c__Clostridia	o__Clostridiales	f__Lachnospiraceae	g__Roseburia	261	148	39	0	0	0	0	0	0
d__Bacteria	k__norank	p__Firmicutes	c__Clostridia	o__Clostridiales	f__Ruminococcaceae	g__Ruminococcaceae_NK4A214_group	197	5	119	1	0	0	0	0	0
d__Bacteria	k__norank	p__Firmicutes	c__Erysipelotrichia	o__Erysipelotrichales	f__Erysipelotrichaceae	g__unclassified_f__Erysipelotrichaceae	0	0	0	0	0	0	0	0	0
d__Bacteria	k__norank	p__Bacteroidetes	c__Bacteroidia	o__Bacteroidales	f__Prevotellaceae	g__Prevotella_2	1634	1516	446	0	0	0	0	0	0
d__Bacteria	k__norank	p__Bacteroidetes	c__Bacteroidia	o__Bacteroidales	f__Prevotellaceae	g__Prevotella_1	443	66	187	0	0	0	0	0	0
d__Bacteria	k__norank	p__Bacteroidetes	c__Bacteroidia	o__Bacteroidales	f__Prevotellaceae	g__Prevotella_7	268	211	193	0	0	0	0	0	0
d__Bacteria	k__norank	p__Firmicutes	c__Clostridia	o__Clostridiales	f__Clostridiaceae_1	g__Clostridium_sensu_stricto_1	12	52	0	0	0	0	0	0	0
d__Bacteria	k__norank	p__Proteobacteria	c__Gammaproteobacteria	o__Aeromonadales	f__Aeromonadaceae	g__Aeromonas	0	0	0	0	0	36	0	0	0
d__Bacteria	k__norank	p__Bacteroidetes	c__Bacteroidia	o__Bacteroidales	f__Prevotellaceae	g__Prevotella_9	6680	11272	1991	6	0	0	0	0	1
d__Bacteria	k__norank	p__Bacteroidetes	c__Bacteroidia	o__Bacteroidales	f__Porphyromonadaceae	g__Parabacteroides	128	35	176	0	0	0	0	0	0
d__Bacteria	k__norank	p__Firmicutes	c__Clostridia	o__Clostridiales	f__Lachnospiraceae	g__Lachnospiraceae_NK3A20_group	62	0	0	0	0	0	0	0	0
d__Bacteria	k__norank	p__Proteobacteria	c__Deltaproteobacteria	o__Bradymonadales	f__norank_o__Bradymonadales	g__norank_o__Bradymonadales	275	0	669	0	0	0	0	0	0
d__Bacteria	k__norank	p__Firmicutes	c__Erysipelotrichia	o__Erysipelotrichales	f__Erysipelotrichaceae	g__Asteroleplasma	27	15	0	3340	0	6741	0	0	5784
d__Bacteria	k__norank	p__Firmicutes	c__Negativicutes	o__Selenomonadales	f__Veillonellaceae	g__Allisonella	0	11	0	0	0	0	0	0	0
d__Bacteria	k__norank	p__Firmicutes	c__Clostridia	o__Clostridiales	f__Lachnospiraceae	g__[Eubacterium]_ruminantium_group	146	13	12	0	0	0	0	0	0
d__Bacteria	k__norank	p__Actinobacteria	c__Actinobacteria	o__Coriobacteriales	f__Coriobacteriaceae	g__unclassified_f__Coriobacteriaceae	2	0	0	0	0	0	0	0	0
d__Bacteria	k__norank	p__Firmicutes	c__Bacilli	o__Lactobacillales	f__Carnobacteriaceae	g__Atopostipes	0	0	0	0	0	0	0	10	0
d__Bacteria	k__norank	p__Firmicutes	c__Erysipelotrichia	o__Erysipelotrichales	f__Erysipelotrichaceae	g__Solobacterium	58	9	17	0	0	0	0	0	0
d__Bacteria	k__norank	p__Firmicutes	c__Clostridia	o__Clostridiales	f__Ruminococcaceae	g__Ruminococcaceae_UCG-002	1615	93	932	1	0	0	1	0	0
d__Bacteria	k__norank	p__Firmicutes	c__Clostridia	o__Clostridiales	f__Lachnospiraceae	g__[Eubacterium]_ventriosum_group	12	0	1	0	0	0	0	0	0
d__Bacteria	k__norank	p__Firmicutes	c__Clostridia	o__Clostridiales	f__Ruminococcaceae	g__norank_f__Ruminococcaceae	12	32	2	0	0	0	0	0	0
d__Bacteria	k__norank	p__Firmicutes	c__Clostridia	o__Clostridiales	f__Lachnospiraceae	g__Blautia	186	60	68	2	1	0	0	0	0
d__Bacteria	k__norank	p__Firmicutes	c__Clostridia	o__Clostridiales	f__Ruminococcaceae	g__Anaerotruncus	173	2	113	0	0	0	0	0	0
d__Bacteria	k__norank	p__Bacteroidetes	c__Bacteroidia	o__Bacteroidales	f__Rikenellaceae	g__Alistipes	5	1	0	0	0	0	0	0	0
d__Bacteria	k__norank	p__Bacteroidetes	c__Bacteroidia	o__Bacteroidales	f__Prevotellaceae	g__Prevotellaceae_UCG-001	42	75	26	0	0	0	0	0	0
d__Bacteria	k__norank	p__Firmicutes	c__Bacilli	o__Lactobacillales	f__Aerococcaceae	g__Ignavigranum	0	0	0	0	0	0	0	53	0
d__Bacteria	k__norank	p__Bacteroidetes	c__Bacteroidia	o__Bacteroidales	f__Bacteroidaceae	g__Bacteroides	3	11	15	0	0	0	0	0	0
d__Bacteria	k__norank	p__Bacteroidetes	c__Bacteroidia	o__Bacteroidales	f__Rikenellaceae	g__U29-B03	0	0	0	0	0	0	0	0	0
d__Bacteria	k__norank	p__Firmicutes	c__Clostridia	o__Clostridiales	f__Lachnospiraceae	g__Dorea	68	38	21	0	0	0	0	0	0
d__Bacteria	k__norank	p__Firmicutes	c__Erysipelotrichia	o__Erysipelotrichales	f__Erysipelotrichaceae	g__Erysipelotrichaceae_UCG-003	0	3	0	0	0	0	0	0	0
d__Bacteria	k__norank	p__Firmicutes	c__Erysipelotrichia	o__Erysipelotrichales	f__Erysipelotrichaceae	g__Erysipelotrichaceae_UCG-004	2	1	0	0	0	0	0	0	0
d__Bacteria	k__norank	p__Firmicutes	c__Erysipelotrichia	o__Erysipelotrichales	f__Erysipelotrichaceae	g__Erysipelotrichaceae_UCG-006	13	3	32	0	0	0	0	0	0
d__Bacteria	k__norank	p__Firmicutes	c__Clostridia	o__Clostridiales	f__Lachnospiraceae	g__[Eubacterium]_xylanophilum_group	72	12	40	0	0	0	0	0	0
d__Bacteria	k__norank	p__Proteobacteria	c__Gammaproteobacteria	o__Aeromonadales	f__Succinivibrionaceae	g__Succinivibrio	161	253	49	0	0	0	0	0	0
d__Bacteria	k__norank	p__Firmicutes	c__Clostridia	o__Clostridiales	f__Family_XIII	g__Mogibacterium	4	1	2	0	0	0	0	0	0
d__Bacteria	k__norank	p__Firmicutes	c__Clostridia	o__Clostridiales	f__Lachnospiraceae	g__Lachnospiraceae_FCS020_group	14	1	6	0	0	0	0	0	0
d__Bacteria	k__norank	p__Firmicutes	c__Bacilli	o__Bacillales	f__Family_XI_o__Bacillales	g__Gemella	0	1	0	0	0	0	0	0	0
d__Bacteria	k__norank	p__Bacteroidetes	c__Bacteroidia	o__Bacteroidales	f__Prevotellaceae	g__Alloprevotella	333	731	119	0	0	0	0	0	0
d__Bacteria	k__norank	p__Firmicutes	c__Negativicutes	o__Selenomonadales	f__Veillonellaceae	g__norank_f__Veillonellaceae	3	7	0	0	0	0	0	0	0
d__Bacteria	k__norank	p__Bacteroidetes	c__Bacteroidia	o__Bacteroidales	f__Bacteroidales_S24-7_group	g__norank_f__Bacteroidales_S24-7_group	3058	241	5762	0	0	0	0	0	0
d__Bacteria	k__norank	p__Firmicutes	c__Clostridia	o__Clostridiales	f__Ruminococcaceae	g__Ruminiclostridium_5	4	2	1	0	0	0	0	0	0
d__Bacteria	k__norank	p__Firmicutes	c__Clostridia	o__Clostridiales	f__Ruminococcaceae	g__Ruminococcus_2	17	7	6	0	0	0	0	0	0
d__Bacteria	k__norank	p__Firmicutes	c__Clostridia	o__Clostridiales	f__Ruminococcaceae	g__Ruminococcus_1	176	151	74	0	0	0	0	0	0
d__Bacteria	k__norank	p__Saccharibacteria	c__Unknown_Class_p__Saccharibacteria	o__Unknown_Order_c__Unknown_Class_p__Saccharibacteria	f__Unknown_Family_o__Unknown_Order_c__Unknown_Class_p__Saccharibacteria	g__Candidatus_Saccharimonas	6	0	0	0	0	0	0	0	0
d__Bacteria	k__norank	p__Firmicutes	c__Clostridia	o__Clostridiales	f__Family_XIII	g__Family_XIII_UCG-001	15	15	8	0	0	0	0	0	0
d__Bacteria	k__norank	p__Firmicutes	c__Erysipelotrichia	o__Erysipelotrichales	f__Erysipelotrichaceae	g__Holdemanella	41	16	6	0	0	0	0	0	0
d__Bacteria	k__norank	p__Firmicutes	c__Clostridia	o__Clostridiales	f__Lachnospiraceae	g__Coprococcus_3	23	11	14	0	0	0	0	0	0
d__Bacteria	k__norank	p__Firmicutes	c__Clostridia	o__Clostridiales	f__Lachnospiraceae	g__Coprococcus_2	80	294	0	0	0	0	0	0	0
d__Bacteria	k__norank	p__Firmicutes	c__Clostridia	o__Clostridiales	f__Lachnospiraceae	g__Coprococcus_1	22	59	43	0	0	0	0	0	0
d__Bacteria	k__norank	p__Firmicutes	c__Bacilli	o__Lactobacillales	f__Streptococcaceae	g__Streptococcus	73	44	3	0	0	0	13	1	3
d__Bacteria	k__norank	p__Actinobacteria	c__Actinobacteria	o__Streptomycetales	f__Streptomycetaceae	g__Streptomyces	1	5	3	0	0	0	0	6	4
d__Bacteria	k__norank	p__Proteobacteria	c__Gammaproteobacteria	o__Aeromonadales	f__Succinivibrionaceae	g__Ruminobacter	0	18	0	0	0	0	0	0	0
d__Bacteria	k__norank	p__Bacteroidetes	c__Bacteroidia	o__Bacteroidales	f__Porphyromonadaceae	g__norank_f__Porphyromonadaceae	75	0	0	0	0	0	0	0	0
d__Bacteria	k__norank	p__Firmicutes	c__Clostridia	o__Clostridiales	f__Ruminococcaceae	g__Ruminococcaceae_UCG-004	0	0	0	0	0	0	0	0	0
d__Bacteria	k__norank	p__Firmicutes	c__Clostridia	o__Clostridiales	f__Ruminococcaceae	g__Ruminococcaceae_UCG-005	356	77	504	0	0	0	1	0	0
d__Bacteria	k__norank	p__Proteobacteria	c__Gammaproteobacteria	o__Pasteurellales	f__Pasteurellaceae	g__unclassified_f__Pasteurellaceae	1	1	0	0	0	1	0	0	0
d__Bacteria	k__norank	p__Firmicutes	c__Clostridia	o__Clostridiales	f__Ruminococcaceae	g__Ruminococcaceae_UCG-003	272	76	121	0	0	0	0	0	0
d__Bacteria	k__norank	p__Actinobacteria	c__Actinobacteria	o__Corynebacteriales	f__Nocardiaceae	g__Rhodococcus	3	2	1	3	2	15	8	16	6
d__Bacteria	k__norank	p__Bacteroidetes	c__Bacteroidia	o__Bacteroidales	f__Bacteroidales_BS11_gut_group	g__norank_f__Bacteroidales_BS11_gut_group	44	0	0	0	0	0	0	0	0
d__Bacteria	k__norank	p__Firmicutes	c__Clostridia	o__Clostridiales	f__Ruminococcaceae	g__Ruminococcaceae_UCG-008	66	28	38	0	0	0	0	0	0
d__Bacteria	k__norank	p__Firmicutes	c__Clostridia	o__Clostridiales	f__Ruminococcaceae	g__Ruminococcaceae_UCG-010	157	3	106	0	0	0	0	0	0
d__Bacteria	k__norank	p__Proteobacteria	c__Epsilonproteobacteria	o__Campylobacterales	f__Campylobacteraceae	g__Campylobacter	81	6	561	0	0	0	0	0	0
d__Bacteria	k__norank	p__Bacteroidetes	c__Bacteroidia	o__Bacteroidales	f__Bacteroidales_RF16_group	g__norank_f__Bacteroidales_RF16_group	47	3	34	0	0	0	0	0	0
d__Bacteria	k__norank	p__Bacteroidetes	c__Bacteroidia	o__Bacteroidales	f__Prevotellaceae	g__Prevotellaceae_NK3B31_group	296	121	1041	0	0	0	0	0	0
d__Bacteria	k__norank	p__Spirochaetae	c__Spirochaetes	o__Spirochaetales	f__Brachyspiraceae	g__Brachyspira	30	185	0	0	0	0	0	0	0
d__Bacteria	k__norank	p__Firmicutes	c__Bacilli	o__Lactobacillales	f__Carnobacteriaceae	g__norank_f__Carnobacteriaceae	0	0	0	0	0	0	0	2	0
d__Bacteria	k__norank	p__Firmicutes	c__Clostridia	o__Clostridiales	f__Ruminococcaceae	g__Faecalibacterium	942	1112	377	1	0	0	0	1	2
d__Bacteria	k__norank	p__Actinobacteria	c__Actinobacteria	o__Coriobacteriales	f__Coriobacteriaceae	g__norank_f__Coriobacteriaceae	1	0	6	0	0	0	0	0	0
d__Bacteria	k__norank	p__Firmicutes	c__Clostridia	o__Clostridiales	f__Ruminococcaceae	g__Ruminococcaceae_UCG-009	41	0	30	0	0	0	0	0	0
d__Bacteria	k__norank	p__Firmicutes	c__Clostridia	o__Clostridiales	f__Peptococcaceae	g__norank_f__Peptococcaceae	1	0	0	0	0	0	0	0	0
d__Bacteria	k__norank	p__Bacteroidetes	c__Bacteroidia	o__Bacteroidales	f__Rikenellaceae	g__Rikenellaceae_RC9_gut_group	393	133	310	0	0	0	0	0	0
d__Bacteria	k__norank	p__Bacteroidetes	c__unclassified_p__Bacteroidetes	o__unclassified_p__Bacteroidetes	f__unclassified_p__Bacteroidetes	g__unclassified_p__Bacteroidetes	0	5	14	0	0	0	0	0	0
d__Bacteria	k__norank	p__Firmicutes	c__Clostridia	o__Clostridiales	f__Lachnospiraceae	g__Lachnospiraceae_NK4B4_group	2	0	14	0	0	0	0	0	0
d__Bacteria	k__norank	p__Firmicutes	c__Negativicutes	o__Selenomonadales	f__Veillonellaceae	g__unclassified_f__Veillonellaceae	14	0	0	0	0	0	0	0	0
d__Bacteria	k__norank	p__Spirochaetae	c__Spirochaetes	o__Spirochaetales	f__Spirochaetaceae	g__Sphaerochaeta	38	3	59	0	0	0	0	0	0
d__Bacteria	k__norank	p__Firmicutes	c__Clostridia	o__Clostridiales	f__Ruminococcaceae	g__Butyricicoccus	20	10	7	0	0	0	0	0	0
d__Bacteria	k__norank	p__Tenericutes	c__Mollicutes	o__Mollicutes_RF9	f__norank_o__Mollicutes_RF9	g__norank_o__Mollicutes_RF9	83	14	10	0	0	0	0	0	0
d__Bacteria	k__norank	p__Proteobacteria	c__Gammaproteobacteria	o__Enterobacteriales	f__Enterobacteriaceae	g__Escherichia-Shigella	0	0	0	22607	25966	19168	25919	25738	20089
d__Bacteria	k__norank	p__Firmicutes	c__Clostridia	o__Clostridiales	f__Lachnospiraceae	g__Lachnospiraceae_NK4A136_group	216	271	226	0	0	0	0	1	0
d__Bacteria	k__norank	p__Bacteroidetes	c__Bacteroidia	o__Bacteroidales	f__p-2534-18B5_gut_group	g__norank_f__p-2534-18B5_gut_group	148	0	0	0	0	0	0	0	0
d__Bacteria	k__norank	p__Bacteroidetes	c__Sphingobacteriia	o__Sphingobacteriales	f__Chitinophagaceae	g__Niabella	0	0	0	0	0	0	0	0	2
d__Bacteria	k__norank	p__Proteobacteria	c__Deltaproteobacteria	o__Desulfovibrionales	f__Desulfovibrionaceae	g__Desulfovibrio	32	1	67	0	0	0	0	0	0
d__Bacteria	k__norank	p__Firmicutes	c__Clostridia	o__Clostridiales	f__Lachnospiraceae	g__Lachnospiraceae_NC2004_group	4	2	0	0	0	0	0	0	0
d__Bacteria	k__norank	p__Firmicutes	c__Clostridia	o__Clostridiales	f__Lachnospiraceae	g__Lachnospiraceae_ND3007_group	35	7	17	0	0	0	0	0	0
d__Bacteria	k__norank	p__Firmicutes	c__Clostridia	o__Clostridiales	f__Lachnospiraceae	g__Anaerostipes	108	2	1	0	0	0	0	0	0
d__Bacteria	k__norank	p__Firmicutes	c__Negativicutes	o__Selenomonadales	f__Veillonellaceae	g__Megasphaera	78	1294	965	0	0	0	0	0	0
d__Bacteria	k__norank	p__Firmicutes	c__Bacilli	o__Lactobacillales	f__Aerococcaceae	g__Aerococcus	0	0	0	0	0	0	0	3	0
d__Bacteria	k__norank	p__Firmicutes	c__Clostridia	o__Clostridiales	f__Lachnospiraceae	g__unclassified_f__Lachnospiraceae	1026	474	1581	1	1	0	0	0	0
d__Bacteria	k__norank	p__unclassified_k__norank	c__unclassified_k__norank	o__unclassified_k__norank	f__unclassified_k__norank	g__unclassified_k__norank	0	0	0	0	0	9	0	3	14
d__Bacteria	k__norank	p__Bacteroidetes	c__Bacteroidia	o__Bacteroidales	f__Prevotellaceae	g__unclassified_f__Prevotellaceae	343	499	53	0	0	0	0	0	0
d__Bacteria	k__norank	p__Firmicutes	c__Clostridia	o__Clostridiales	f__Lachnospiraceae	g__Lachnoclostridium	85	108	30	1	0	0	0	0	0
d__Bacteria	k__norank	p__Firmicutes	c__Erysipelotrichia	o__Erysipelotrichales	f__Erysipelotrichaceae	g__Catenibacterium	190	14	6	0	0	0	0	0	0
d__Bacteria	k__norank	p__Firmicutes	c__Clostridia	o__Clostridiales	f__Ruminococcaceae	g__Ruminiclostridium_1	0	0	9	0	0	0	0	0	0
d__Bacteria	k__norank	p__Firmicutes	c__Clostridia	o__Clostridiales	f__Ruminococcaceae	g__Ruminiclostridium_6	37	38	292	0	0	0	0	0	0
d__Bacteria	k__norank	p__Firmicutes	c__Clostridia	o__Clostridiales	f__Family_XIII	g__Family_XIII_AD3011_group	45	3	8	0	0	0	0	0	0
d__Bacteria	k__norank	p__Actinobacteria	c__Actinobacteria	o__Coriobacteriales	f__Coriobacteriaceae	g__Coriobacteriaceae_UCG-003	0	0	1	0	0	0	0	0	0
d__Bacteria	k__norank	p__Actinobacteria	c__Actinobacteria	o__Actinomycetales	f__Actinomycetaceae	g__Trueperella	0	0	0	0	0	0	0	12	0
d__Bacteria	k__norank	p__Firmicutes	c__Clostridia	o__Clostridiales	f__Ruminococcaceae	g__Ruminiclostridium_9	25	15	3	0	0	0	0	0	0
d__Bacteria	k__norank	p__Firmicutes	c__Clostridia	o__Clostridiales	f__Lachnospiraceae	g__Oribacterium	245	126	304	0	0	0	0	0	0
d__Bacteria	k__norank	p__Actinobacteria	c__Actinobacteria	o__Propionibacteriales	f__Nocardioidaceae	g__Nocardioides	1	31	10	0	0	0	17	38	23
d__Bacteria	k__norank	p__Firmicutes	c__Clostridia	o__Clostridiales	f__Family_XIII	g__[Eubacterium]_nodatum_group	32	11	21	0	0	0	0	0	0
d__Bacteria	k__norank	p__Fibrobacteres	c__Fibrobacteria	o__Fibrobacterales	f__Fibrobacteraceae	g__Fibrobacter	13	0	0	0	0	0	0	0	0
d__Bacteria	k__norank	p__Firmicutes	c__Clostridia	o__Clostridiales	f__Ruminococcaceae	g__Candidatus_Soleaferrea	107	0	9	0	0	0	0	0	0
d__Bacteria	k__norank	p__Firmicutes	c__Clostridia	o__Clostridiales	f__Lachnospiraceae	g__Marvinbryantia	16	2	15	0	0	0	0	0	0
d__Bacteria	k__norank	p__Firmicutes	c__Clostridia	o__Clostridiales	f__Lachnospiraceae	g__Lachnospiraceae_XPB1014_group	0	0	0	0	0	0	0	0	0
d__Bacteria	k__norank	p__Firmicutes	c__Clostridia	o__Clostridiales	f__unclassified_o__Clostridiales	g__unclassified_o__Clostridiales	0	0	0	0	0	0	0	0	0
d__Bacteria	k__norank	p__Firmicutes	c__Bacilli	o__Lactobacillales	f__Lactobacillaceae	g__Lactobacillus	454	1282	3543	1	0	0	1	1	1
d__Bacteria	k__norank	p__Proteobacteria	c__Gammaproteobacteria	o__Pasteurellales	f__Pasteurellaceae	g__Actinobacillus	1	0	0	0	0	0	0	0	0
d__Bacteria	k__norank	p__Bacteroidetes	c__Bacteroidia	o__Bacteroidales	f__unclassified_o__Bacteroidales	g__unclassified_o__Bacteroidales	3	0	0	0	0	0	0	0	0
d__Bacteria	k__norank	p__Firmicutes	c__Clostridia	o__Clostridiales	f__Ruminococcaceae	g__Oscillibacter	27	0	49	0	0	0	0	0	0
d__Bacteria	k__norank	p__Bacteroidetes	c__Bacteroidia	o__Bacteroidales	f__Prevotellaceae	g__norank_f__Prevotellaceae	416	495	313	0	0	0	0	0	0
d__Bacteria	k__norank	p__Tenericutes	c__Mollicutes	o__Mycoplasmatales	f__Mycoplasmataceae	g__norank_f__Mycoplasmataceae	4	0	0	0	0	0	0	0	0
d__Bacteria	k__norank	p__Firmicutes	c__Clostridia	o__Clostridiales	f__Lachnospiraceae	g__Howardella	1	17	0	0	0	0	0	0	0
d__Bacteria	k__norank	p__Firmicutes	c__Clostridia	o__Clostridiales	f__Family_XI_o__Clostridiales	g__norank_f__Family_XI	0	0	0	0	0	0	0	5	0
d__Bacteria	k__norank	p__Proteobacteria	c__Alphaproteobacteria	o__Rhodospirillales	f__Rhodospirillaceae	g__norank_f__Rhodospirillaceae	13	33	0	0	0	0	0	0	0
d__Bacteria	k__norank	p__Firmicutes	c__Clostridia	o__Clostridiales	f__Ruminococcaceae	g__unclassified_f__Ruminococcaceae	62	33	72	0	0	0	0	0	0
d__Bacteria	k__norank	p__Cyanobacteria	c__Cyanobacteria	o__norank_c__Cyanobacteria	f__norank_c__Cyanobacteria	g__norank_c__Cyanobacteria	0	0	0	0	0	0	7	5	27
d__Bacteria	k__norank	p__Firmicutes	c__Negativicutes	o__Selenomonadales	f__Veillonellaceae	g__Anaerovibrio	172	795	88	0	0	0	0	0	0
d__Bacteria	k__norank	p__Bacteroidetes	c__Bacteroidia	o__Bacteroidales	f__Prevotellaceae	g__Prevotellaceae_UCG-003	40	106	390	0	0	0	0	0	0
d__Bacteria	k__norank	p__Firmicutes	c__Clostridia	o__Clostridiales	f__Lachnospiraceae	g__Fusicatenibacter	15	17	10	0	0	0	0	0	0
d__Bacteria	k__norank	p__Actinobacteria	c__Actinobacteria	o__Corynebacteriales	f__Corynebacteriaceae	g__Corynebacterium_1	0	0	0	0	0	0	1	4	2
d__Bacteria	k__norank	p__Bacteroidetes	c__Bacteroidia	o__Bacteroidales	f__Prevotellaceae	g__Prevotellaceae_UCG-004	18	4	1	0	0	0	0	0	0
d__Bacteria	k__norank	p__Tenericutes	c__Mollicutes	o__Anaeroplasmatales	f__Anaeroplasmataceae	g__Anaeroplasma	0	19	1	0	0	0	0	0	0
d__Bacteria	k__norank	p__Firmicutes	c__Clostridia	o__Clostridiales	f__Ruminococcaceae	g__Ruminococcaceae_UCG-014	183	36	0	0	0	0	0	0	0
d__Bacteria	k__norank	p__Firmicutes	c__Clostridia	o__Clostridiales	f__Lachnospiraceae	g__Lachnospira	58	101	83	0	0	0	0	0	0
d__Bacteria	k__norank	p__Firmicutes	c__Clostridia	o__Clostridiales	f__Ruminococcaceae	g__Ruminococcaceae_UCG-013	50	0	133	0	0	0	0	0	0
d__Bacteria	k__norank	p__Firmicutes	c__Erysipelotrichia	o__Erysipelotrichales	f__Erysipelotrichaceae	g__norank_f__Erysipelotrichaceae	78	1	95	0	0	0	0	0	0
d__Bacteria	k__norank	p__Firmicutes	c__Clostridia	o__Clostridiales	f__Lachnospiraceae	g__norank_f__Lachnospiraceae	3	0	0	0	0	0	0	0	0
d__Bacteria	k__norank	p__Firmicutes	c__Clostridia	o__Clostridiales	f__Lachnospiraceae	g__[Eubacterium]_hallii_group	42	21	9	0	0	0	0	0	0
d__Bacteria	k__norank	p__Cyanobacteria	c__Cyanobacteria	o__Gastranaerophilales	f__norank_o__Gastranaerophilales	g__norank_o__Gastranaerophilales	12	71	1	0	0	0	0	0	0
d__Bacteria	k__norank	p__Proteobacteria	c__Betaproteobacteria	o__Burkholderiales	f__Alcaligenaceae	g__Sutterella	18	109	0	0	0	0	0	0	0
d__Bacteria	k__norank	p__Firmicutes	c__Clostridia	o__Clostridiales	f__Christensenellaceae	g__Christensenellaceae_R-7_group	171	11	104	0	0	0	0	0	0
d__Bacteria	k__norank	p__Firmicutes	c__Bacilli	o__Lactobacillales	f__Aerococcaceae	g__norank_f__Aerococcaceae	0	0	0	0	0	0	0	65	0
d__Bacteria	k__norank	p__Proteobacteria	c__Epsilonproteobacteria	o__Campylobacterales	f__Helicobacteraceae	g__Helicobacter	147	433	0	0	0	0	0	0	0
d__Bacteria	k__norank	p__Elusimicrobia	c__Elusimicrobia	o__Elusimicrobiales	f__Elusimicrobiaceae	g__Elusimicrobium	7	0	0	0	0	0	0	0	0
d__Bacteria	k__norank	p__Actinobacteria	c__Actinobacteria	o__Coriobacteriales	f__Coriobacteriaceae	g__Enterorhabdus	0	0	2	0	0	0	0	0	0
d__Bacteria	k__norank	p__Lentisphaerae	c__Oligosphaeria	o__Oligosphaerales	f__Oligosphaeraceae	g__Z20	10	0	0	0	0	0	0	0	0
d__Bacteria	k__norank	p__Bacteroidetes	c__Bacteroidia	o__Bacteroidales	f__Rikenellaceae	g__dgA-11_gut_group	59	1	15	0	0	0	0	0	0
d__Bacteria	k__norank	p__Chloroflexi	c__Thermomicrobia	o__JG30-KF-CM45	f__norank_o__JG30-KF-CM45	g__norank_o__JG30-KF-CM45	0	0	1	0	0	0	0	2	1
d__Bacteria	k__norank	p__Bacteroidetes	c__Bacteroidia	o__Bacteroidales	f__Porphyromonadaceae	g__unclassified_f__Porphyromonadaceae	7	0	0	0	0	0	0	0	0
d__Bacteria	k__norank	p__Spirochaetae	c__Spirochaetes	o__Spirochaetales	f__Spirochaetaceae	g__Treponema_2	190	23	25	0	0	0	1	0	0
d__Bacteria	k__norank	p__Firmicutes	c__Clostridia	o__Clostridiales	f__Peptostreptococcaceae	g__Intestinibacter	89	4	3	1	0	0	0	0	1
d__Bacteria	k__norank	p__Firmicutes	c__Clostridia	o__Clostridiales	f__Lachnospiraceae	g__[Eubacterium]_eligens_group	149	194	2	0	0	0	0	0	0
d__Bacteria	k__norank	p__Firmicutes	c__Clostridia	o__Clostridiales	f__Clostridiaceae_1	g__Sarcina	85	0	0	0	0	0	0	0	0
d__Bacteria	k__norank	p__Actinobacteria	c__Actinobacteria	o__Micrococcales	f__Micrococcaceae	g__Kocuria	0	1	0	2	0	0	0	0	5
d__Bacteria	k__norank	p__Firmicutes	c__Clostridia	o__Clostridiales	f__Lachnospiraceae	g__Lachnospiraceae_UCG-010	7	27	14	0	0	0	0	0	0
d__Bacteria	k__norank	p__Firmicutes	c__Clostridia	o__Halanaerobiales	f__ODP1230B8.23	g__norank_f__ODP1230B8.23	14	0	5	0	0	0	0	0	0
d__Bacteria	k__norank	p__Firmicutes	c__Clostridia	o__Clostridiales	f__Ruminococcaceae	g__Subdoligranulum	188	240	163	0	0	0	0	0	0
d__Bacteria	k__norank	p__Actinobacteria	c__Actinobacteria	o__Coriobacteriales	f__Coriobacteriaceae	g__Slackia	0	0	0	0	0	0	0	0	0
d__Bacteria	k__norank	p__Actinobacteria	c__Actinobacteria	o__Coriobacteriales	f__Coriobacteriaceae	g__Collinsella	6	7	10	0	0	0	0	0	0
d__Bacteria	k__norank	p__Firmicutes	c__Clostridia	o__Clostridiales	f__Ruminococcaceae	g__Flavonifractor	8	0	4	0	0	0	0	0	0
d__Bacteria	k__norank	p__Proteobacteria	c__Alphaproteobacteria	o__Sphingomonadales	f__Sphingomonadaceae	g__unclassified_f__Sphingomonadaceae	0	0	0	1	0	0	0	0	4
d__Bacteria	k__norank	p__Proteobacteria	c__Alphaproteobacteria	o__Rhodobacterales	f__Rhodobacteraceae	g__Paracoccus	0	0	0	1	0	0	0	0	1
d__Bacteria	k__norank	p__Firmicutes	c__Clostridia	o__Clostridiales	f__Lachnospiraceae	g__[Bacteroides]_pectinophilus_group	2	0	3	0	0	0	0	0	0
d__Bacteria	k__norank	p__Firmicutes	c__Clostridia	o__Clostridiales	f__Lachnospiraceae	g__Moryella	5	1	3	0	0	0	0	0	0
d__Bacteria	k__norank	p__Firmicutes	c__Negativicutes	o__Selenomonadales	f__Veillonellaceae	g__Dialister	188	548	3	0	0	0	0	0	0
d__Bacteria	k__norank	p__Firmicutes	c__Clostridia	o__Clostridiales	f__Peptococcaceae	g__Peptococcus	2	1	5	0	0	0	0	0	0
d__Bacteria	k__norank	p__Firmicutes	c__Clostridia	o__Clostridiales	f__Ruminococcaceae	g__[Eubacterium]_coprostanoligenes_group	381	63	589	0	0	0	0	0	0
d__Bacteria	k__norank	p__Firmicutes	c__Negativicutes	o__Selenomonadales	f__Acidaminococcaceae	g__Phascolarctobacterium	327	934	2160	1	0	0	0	0	0
d__Bacteria	k__norank	p__Firmicutes	c__Clostridia	o__Clostridiales	f__Lachnospiraceae	g__Lachnospiraceae_UCG-004	76	119	20	0	0	0	0	0	0
d__Bacteria	k__norank	p__Firmicutes	c__Clostridia	o__Clostridiales	f__Lachnospiraceae	g__Tyzzerella_3	0	0	1	0	0	0	0	0	0
d__Bacteria	k__norank	p__Firmicutes	c__Clostridia	o__Clostridiales	f__Lachnospiraceae	g__Lachnospiraceae_UCG-003	0	4	1	0	0	0	0	0	0
d__Bacteria	k__norank	p__Actinobacteria	c__Actinobacteria	o__Coriobacteriales	f__Coriobacteriaceae	g__Olsenella	5	1	2	0	0	0	0	0	0
