# Supplementary material for: The altered gut virome community in rhesus monkeys is correlated with the gut bacterial microbiome and associated metabolites
Source: Virol J. 2019 Aug 19;16:105. doi: 10.1186/s12985-019-1211-z (PMC6700990; doi:10.1186/s12985-019-1211-z)
Supplement: Supplementary file 5 — Table S2. The reads number on the family level in the gut virome communities in a longitudinal cohort treated with an antibiotic cocktail. (XLS 2 kb) [file 12985_2019_1211_MOESM5_ESM.xls]

	DNA D0-1	DNA D0-2	DNA D0-3	DNA D9-1	DNA D9-2	DNA D9-3	RNA D0-1	RNA D0-2	RNA D0-3	RNA D9-1	RNA D9-2	RNA D9-3
Adenoviridae	21	31	28	10	4	164	0	14	100	0	11	0
Alloherpesviridae	0	4	1	0	0	0	0	0	10	0	0	0
Alphaflexiviridae	0	0	0	0	0	0	0	1	9	0	0	2
Anelloviridae	1	1	6	0	24	253	0	0	0	0	0	0
Ascoviridae	37	25	8	0	0	0	248	54	9	0	4	4
Asfarviridae	3	3	2	0	0	4	0	0	0	0	0	0
Astroviridae	0	0	0	0	0	0	21	0	8	0	0	71
Baculoviridae	60	67	24	0	0	0	28	55	67	1	4813	3
Betaflexiviridae	114	309	204	0	2	0	3678	121686	3731	696	4276	13496
Bunyaviridae	0	0	0	0	0	0	0	0	86	0	0	0
Caliciviridae	8	3	6	0	0	0	251	0	20	56	0	166
Caulimoviridae	1	2	1	2	0	0	2	0	4	1	0	0
Circoviridae	59687	20134	133992	4726	451	3713	197	39	1058	4	132	746
Closteroviridae	0	0	1	0	0	0	0	0	1	0	0	0
Coronaviridae	0	0	2	0	0	0	0	0	4	0	0	0
Endornaviridae	0	0	0	0	0	0	4	301	26	25	82	2
Flaviviridae	0	0	0	0	0	0	0	0	2	3	0	161
Geminiviridae	2658	107467	184714	21	5	1296	1	155	1174	2	148	1481
Hepadnaviridae	106	0	0	0	0	0	3	0	0	0	0	0
Herpesviridae	376	36	133	3	0	21986	23	1	7	0	4	1
Hytrosaviridae	1	0	0	0	0	0	7	149	59	0	0	1
Inoviridae	3065	23	28	0	0	0	10	6	72	2	27	2125
Iridoviridae	2984	1290	489	0	2	0	459	605	728	1	135	20
Leviviridae	0	0	0	0	0	0	4	0	1	0	0	17
Lipothrixviridae	1	0	0	0	0	0	0	0	10	0	0	0
Luteoviridae	0	0	0	0	0	0	0	0	60	0	0	0
Marseilleviridae	284	545	312	0	0	0	82	153	861	0	1	4
Mesoniviridae	1	0	0	0	0	0	0	0	0	0	0	0
Microviridae	3959943	1405470	526159	156	2515	1275	32599	13030	74794	625	1281	118754
Mimiviridae	1869	7110	494	0	0	2	154	1620	1324	1	80	38
Myoviridae	15930	259653	142358	15	29	2017	6228	73489	239507	578	12910	2348
Nanoviridae	32	186	68	7	0	1	0	0	1	0	0	0
Nimaviridae	408	3615	498	0	47	11	3443	101169	2018	370864	3470811	5570
Nodaviridae	747	9	27	2	3	0	3195	0	27	0	0	0
Nudiviridae	1	0	41	0	0	0	1	0	26	0	0	1
Orthomyxoviridae	254	1433	4593	62	82	38338	13	61	974	16	14	74
Papillomaviridae	0	12	0	0	0	0	0	0	9	0	0	0
Partitiviridae	9	19	19	0	0	0	3	1361	85	0	274	4
Parvoviridae	3	3	1	0	0	0	0	0	0	0	0	0
Phycodnaviridae	1234	5062	2338	0	0	6	485	9210	7833	1	443	75
Picobirnaviridae	353	194	69	0	4	0	7852	452347	5990	12653	67646	4320
Picornaviridae	785	14	20	0	1	0	4637	2689	861	2	1	187
Podoviridae	67626	711469	653314	808	1659	1067	1994	39441	276998	2783	33222	4449
Polyomaviridae	0	0	0	0	0	0	0	4	13	0	0	1
Poxviridae	2968	3038	4495	1	0	1	11	2	46	3	0	29
Reoviridae	10	509	22	0	0	0	24	784	108	0	71	216
Retroviridae	12	0	4	0	0	1	263	168	535	426	274	30
Rudiviridae	0	6	3	0	0	0	0	1	175	0	0	0
Secoviridae	0	0	6	0	0	3	0	0	0	0	0	3
Siphoviridae	36550	116212	36836	16	21	64	16336	23303	84121	945	4332	2520
Tombusviridae	0	0	0	0	0	0	0	0	5	0	0	0
Totiviridae	0	0	3	0	0	0	45	127	7	12	125	1
Tymoviridae	0	0	0	0	0	0	198	518	116	0	0	17
Virgaviridae	0	0	0	0	0	0	0	0	5	0	0	8
norank	6338790	2544494	2272582	6978	11291	15759	67043	82822	132982	603	6390	205756
