# Supplementary material for: The altered gut virome community in rhesus monkeys is correlated with the gut bacterial microbiome and associated metabolites
Source: Virol J. 2019 Aug 19;16:105. doi: 10.1186/s12985-019-1211-z (PMC6700990; doi:10.1186/s12985-019-1211-z)
Supplement: Supplementary file 8 — Table S3. The reads number on the family level belong to bacteriophages and the eukaryotic viruses including DNA viruses and RNA viruses. (XLS 27 kb) [file 12985_2019_1211_MOESM8_ESM.xls]

## Sheet: family
	family	D0-1	D0-2	D0-3	D9-1	D9-2	D9-3	host
DNA virus	Adenoviridae	21	31	28	4	10	164	Vertebrates
	Anelloviridae	1	1	6	24	0	253	Vertebrates
	Herpesviridae	376	36	133	0	3	21986	Vertebrates
	Circoviridae	59687	20134	133992	451	4726	3713	Vertebrates
	Alloherpesviridae	0	4	1	0	0	0	Vertebrates
	Parvoviridae	3	3	1	0	0	0	vertebrates，invertebrates
	Poxviridae	2968	3038	4495	0	1	1	vertebrates，invertebrates
	Iridoviridae	2984	1290	489	2	0	0	vertebrates，invertebrates
	Ascoviridae	37	25	8	0	0	0	invertebrates
	Nimaviridae	408	3615	498	47	0	11	invertebrates
	Baculoviridae	60	67	24	0	0	0	invertebrates
	Caulimoviridae	1	2	1	0	2	0	Plants，insects
	Nanoviridae	32	186	68	0	7	1	Plants
	Geminiviridae	2658	107467	184714	5	21	1296	Plants
	Asfarviridae	3	3	2	0	0	4	vertebrates，invertebrates，protists
	Marseilleviridae	284	545	312	0	0	0	protists，human
	Mimiviridae	1869	7110	494	0	0	2	protists
	Phycodnaviridae	1234	5062	2338	0	0	6	eukaryotic algae
bacteriophage	Inoviridae	3065	23	28	0	0	0	Bacteria
	Microviridae	3959943	1405470	526159	2515	156	1275	Bacteria
	Podoviridae	67626	711469	653314	1659	808	1067	Bacteria
	Myoviridae	15930	259653	142358	29	15	2017	Bacteria and archaea
	Siphoviridae	36550	116212	36836	21	16	64	Bacteria and archaea
	Rudiviridae	0	6	3	0	0	0	archaea
RNA virus	Picornaviridae	4637	2689	861	2	1	187	Vertebrates
	Caliciviridae	251	0	20	56	0	166	Vertebrates
	Astroviridae	21	0	8	0	0	71	Vertebrates
	Orthomyxoviridae	13	61	974	16	14	74	Vertebrates
	Picobirnaviridae	7852	452347	5990	12653	67646	4320	Vertebrates
	Nodaviridae	3195	0	27	0	0	0	Vertebrates and invertebrates
	Reoviridae	24	784	108	0	71	216	vertebrates, invertebrates, plants, protists and fungi
	Tymoviridae	198	518	116	0	0	17	Plants
	Betaflexiviridae	3678	121686	3731	696	4276	13496	Plants，fungi
	Alphaflexiviridae	0	1	9	0	0	2	Plants，fungi
	Partitiviridae	3	1361	85	0	274	4	Plants，fungi
	Endornaviridae	4	301	26	25	82	2	Plants，fungi
	Retroviridae	263	168	535	426	274	30	eukaryotes and prokaryotes
